# Supplementary material for: The differential impact of climate interventions along the political divide in 60 countries
Source: PubMed Central journal article supplement (PMC11078920; doi:10.1038/s41467-024-48112-8), 2024-05-08
Supplement: 41467_2024_48112_MOESM1_ESM.pdf [file 41467_2024_48112_MOESM1_ESM.pdf]

## Supplementary Materials

### **The Differential Impact of Climate Interventions along the Political Divide in 60 Countries**

Michael Berkebile-Weinberg<sup>1,†</sup>, Danielle Goldwert<sup>1,†</sup>, Kimberly C. Doell<sup>2</sup>, Jay J. Van Bavel<sup>1,3</sup>, & Madalina Vlasceanu<sup>1,\*</sup>

<sup>1</sup>Department of Psychology, New York University

<sup>2</sup>Department of Cognition, Emotion, and Methods in Psychology, Faculty of Psychology, University of Vienna

<sup>3</sup>Norwegian School of Economics

† These authors contributed equally

\* Address correspondence to Madalina Vlasceanu [[vlasceanu@nyu.edu](mailto:vlasceanu@nyu.edu)]

## Data and materials availability

All data (including sample information per country) can be found on OSF: <https://osf.io/ytf89/> and all code can be found on GitHub: <https://github.com/mvlasceanu/climatepolarization>. DOI versions of these links can be found in the main article text.

## Supplementary Figures

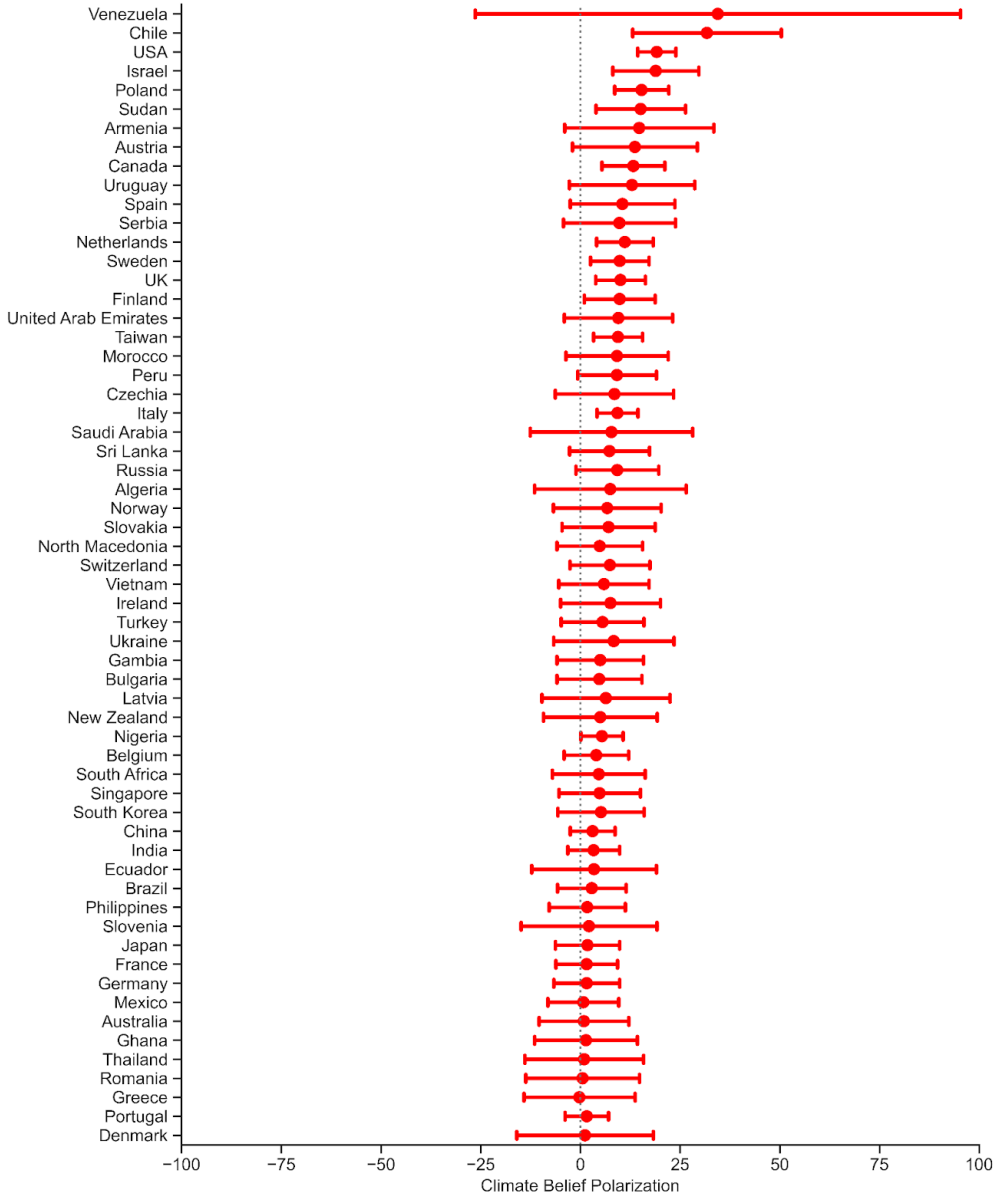

Fig S1. Means and 95% confidence intervals around the means of the degree of belief polarization, defined as the absolute value of the difference between self-reported liberals' and conservatives' belief in climate change.

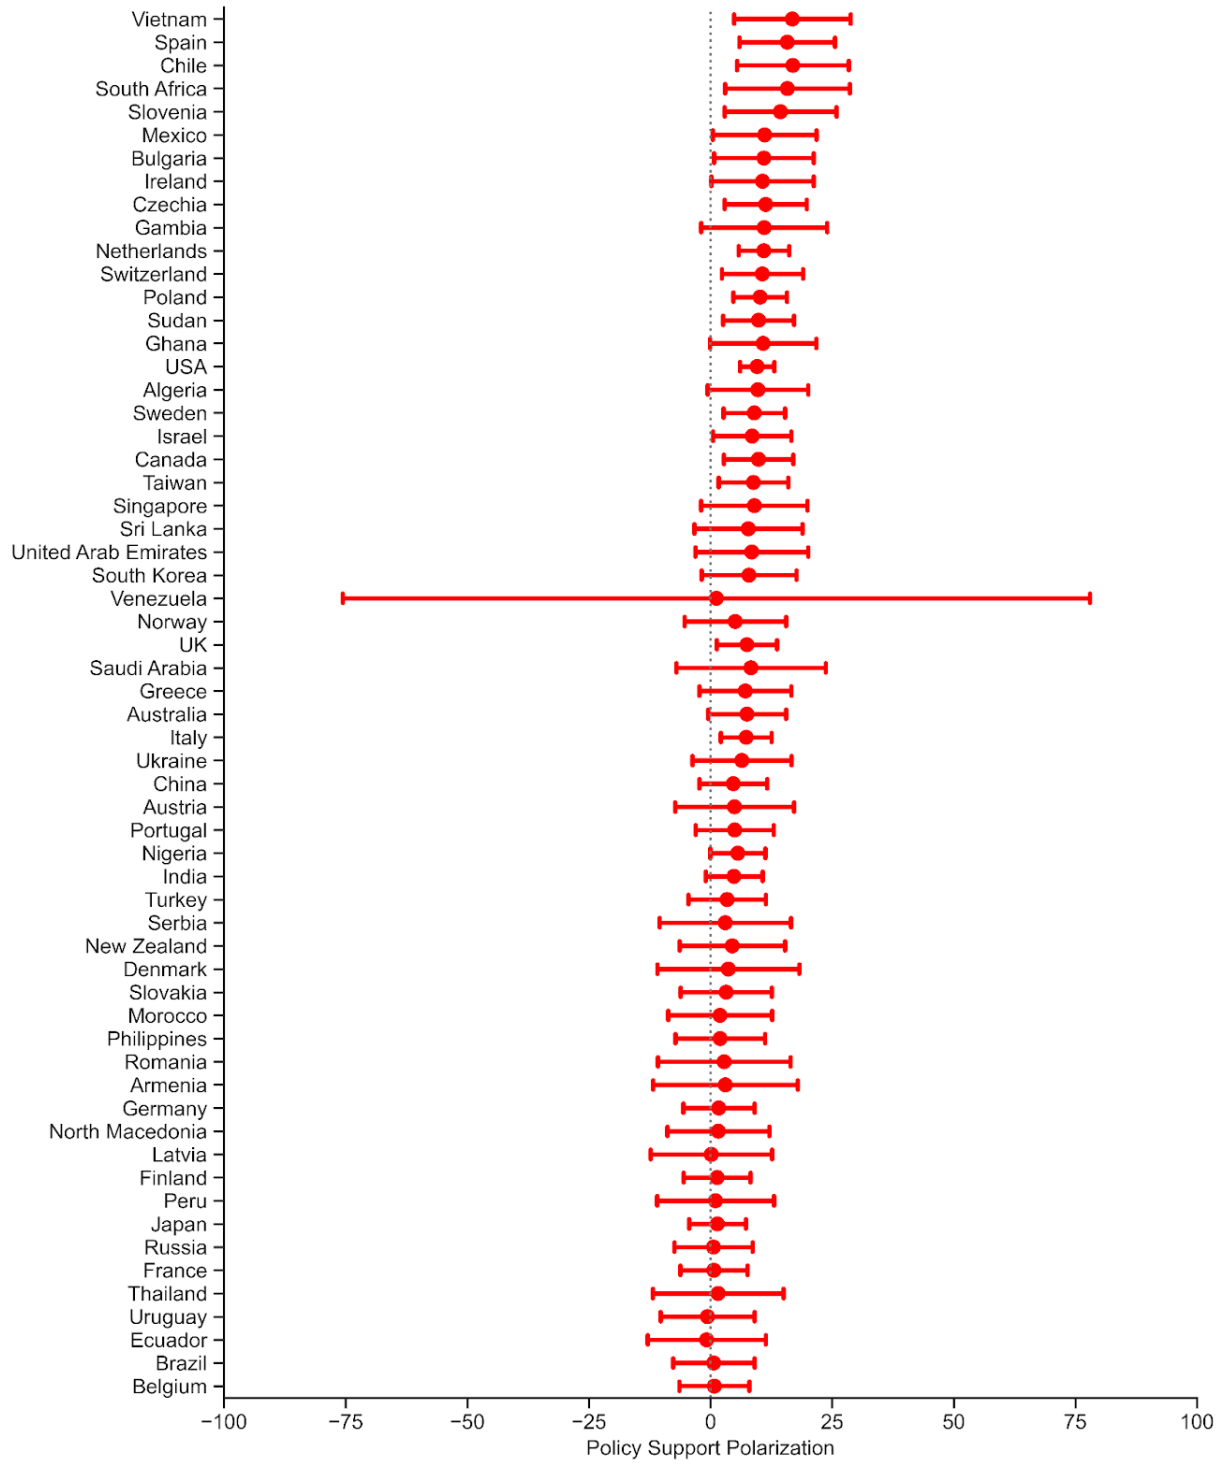

Fig S2. Means and 95% confidence intervals around the means of the degree of climate policy support polarization, defined as the absolute value of the difference between self-reported liberals' and conservatives' climate policy support.

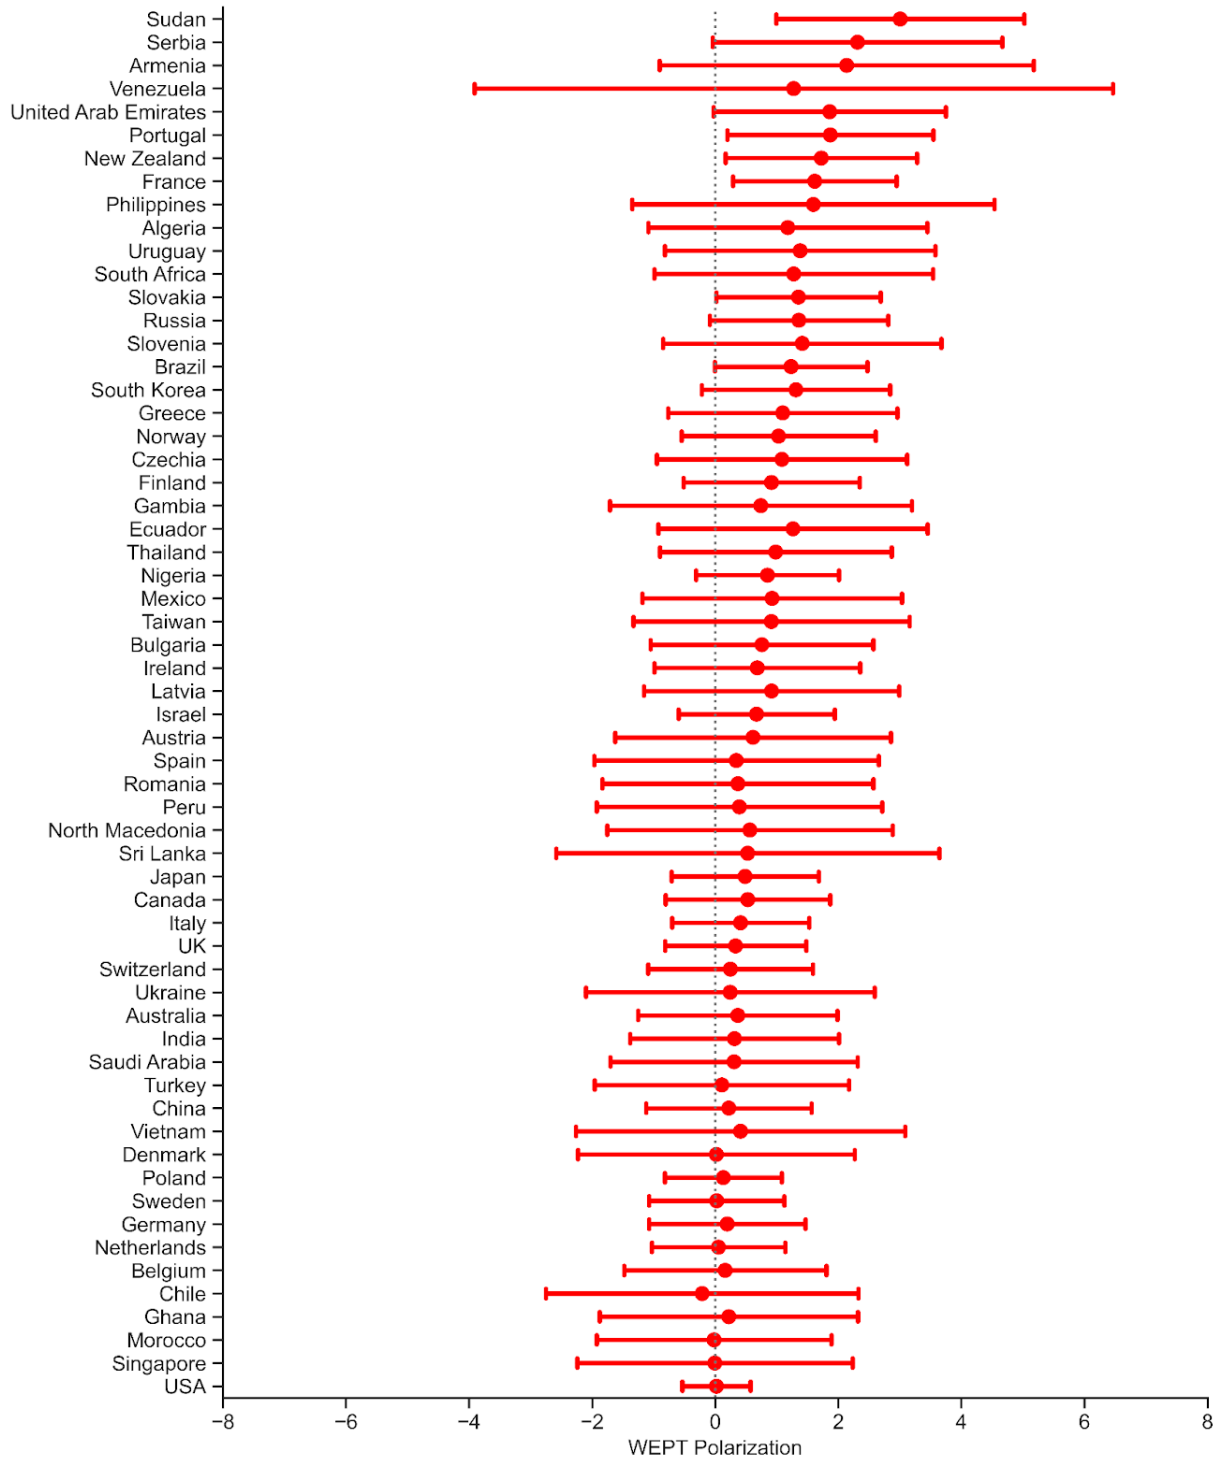

Fig S3. Means and 95% confidence intervals around the means of the degree of climate action polarization, defined as the absolute value of the difference between self-reported liberals' and conservatives' climate action.

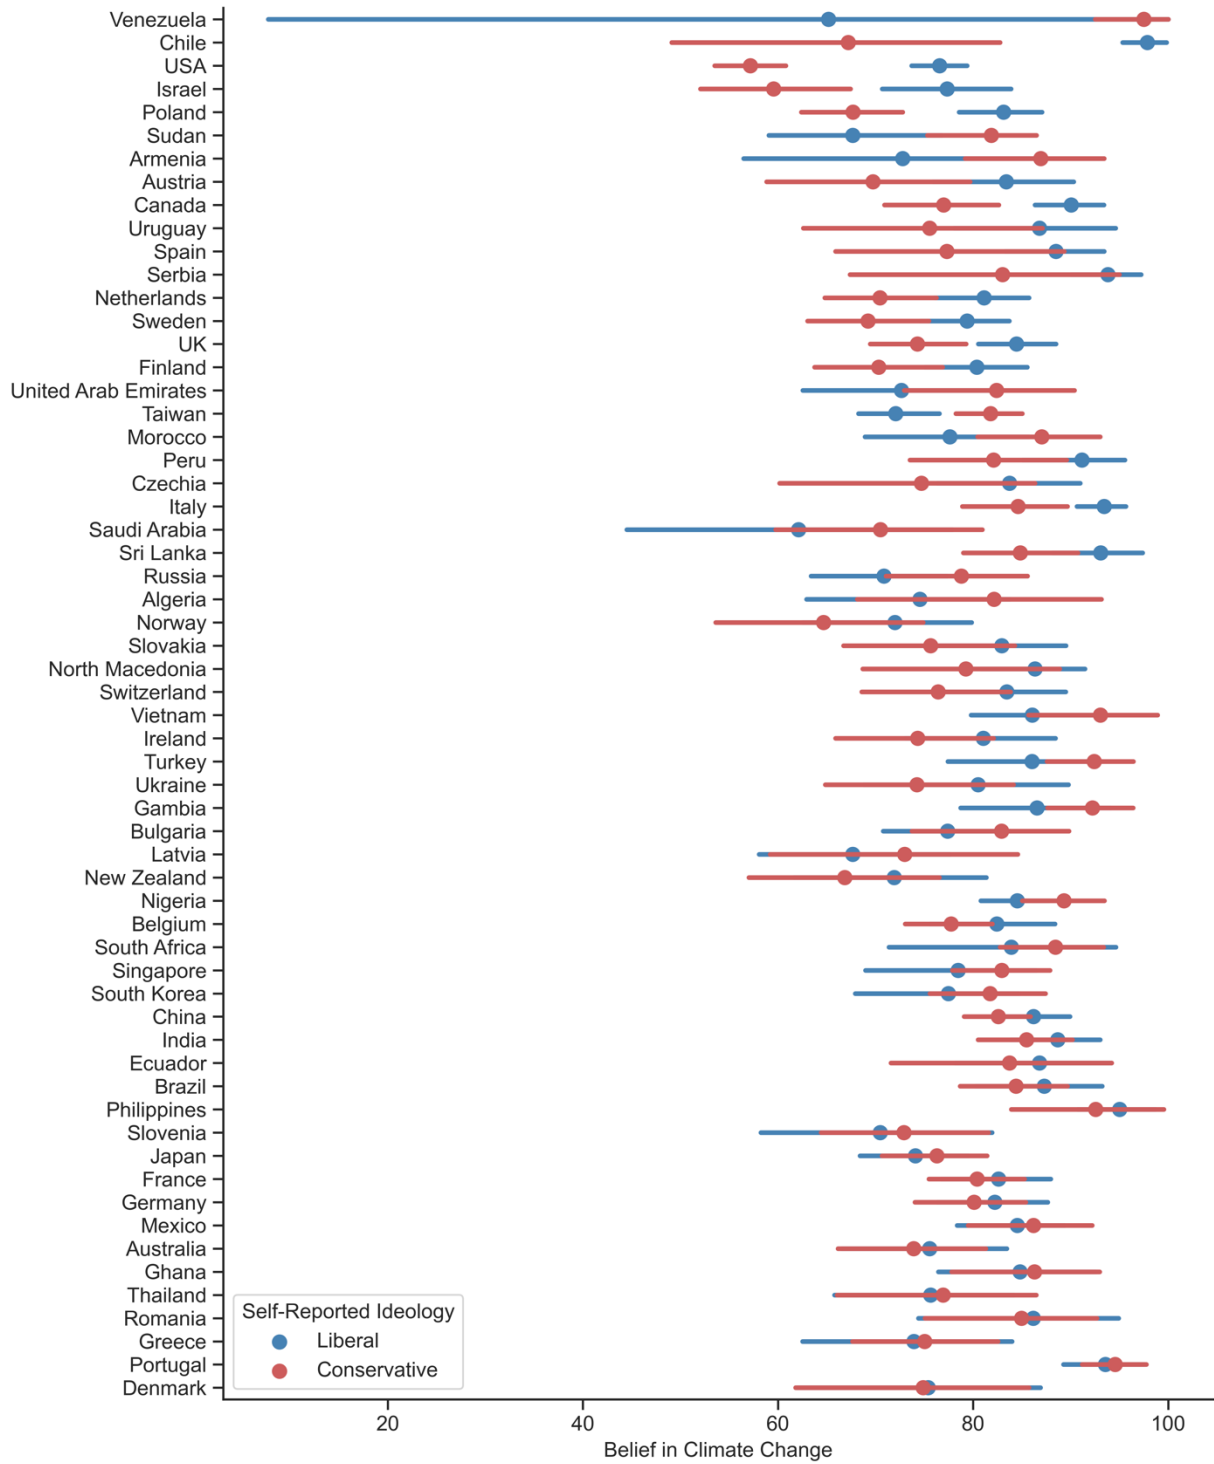

Fig S4. Means and 95% confidence intervals around the means of the belief in climate change raw scores of self-reported liberals (in blue) and conservatives (in red), by country.

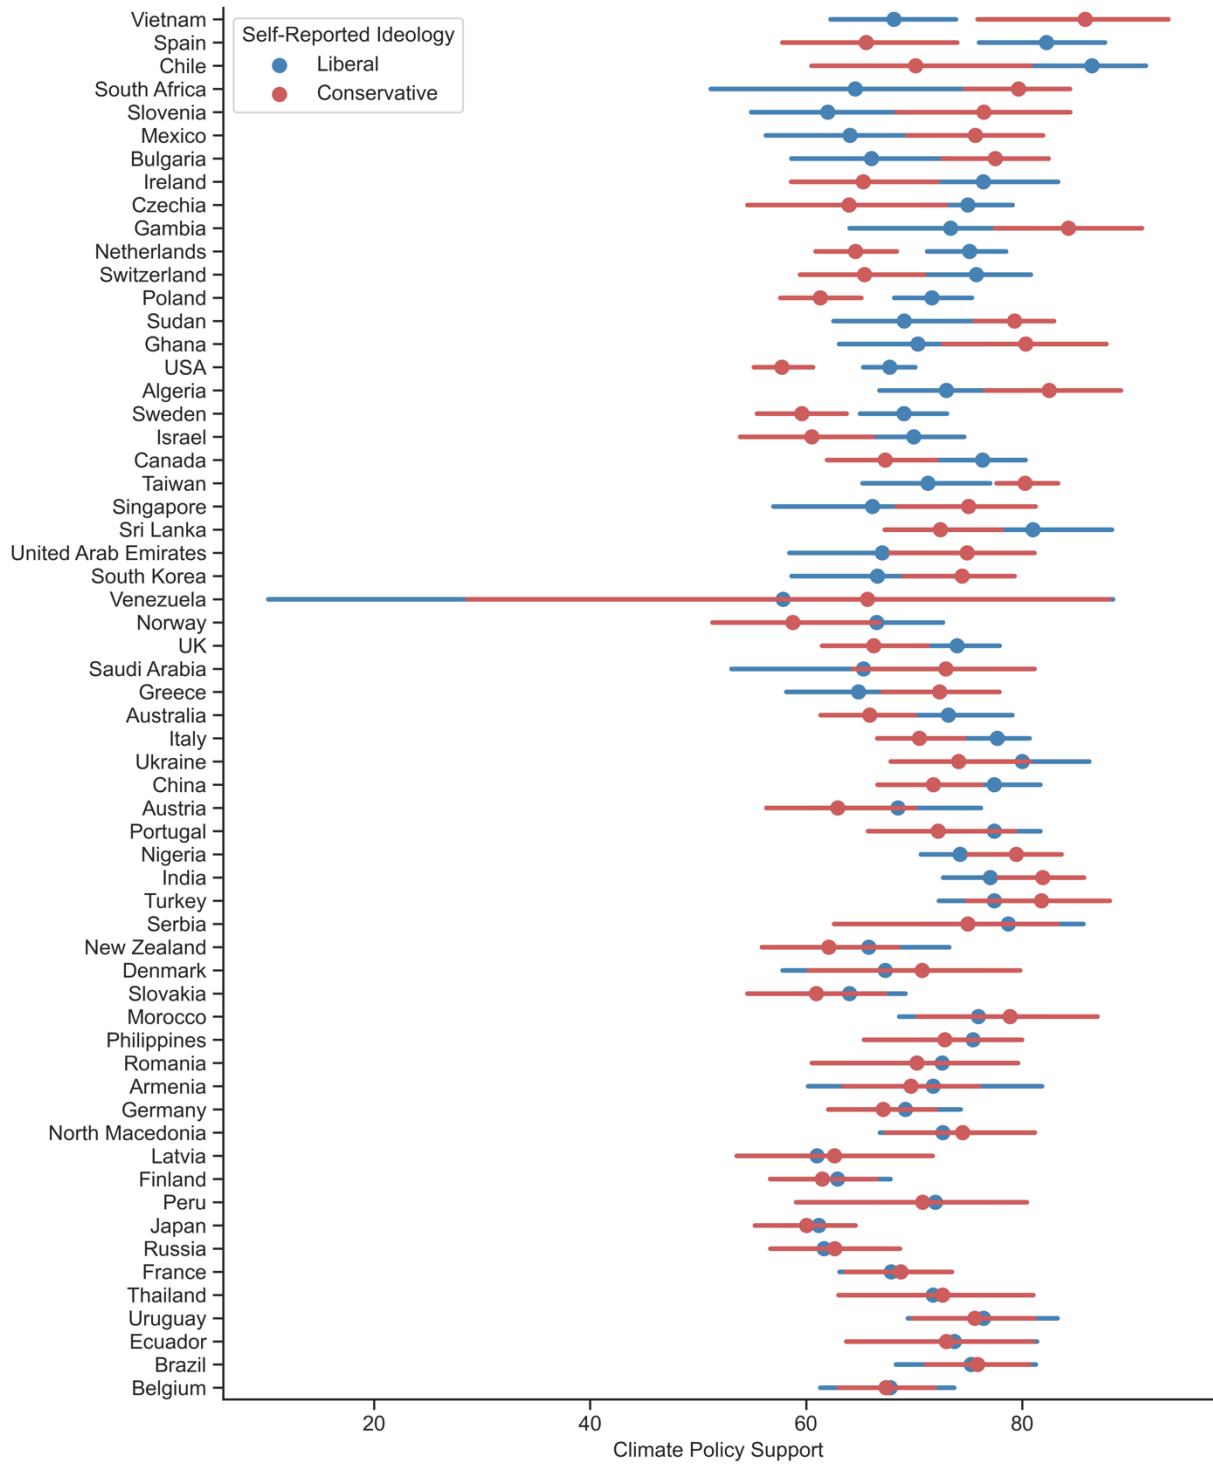

Fig S5. Means and 95% confidence intervals around the means of the climate policy support raw scores of self-reported liberals (in blue) and conservatives (in red), by country.

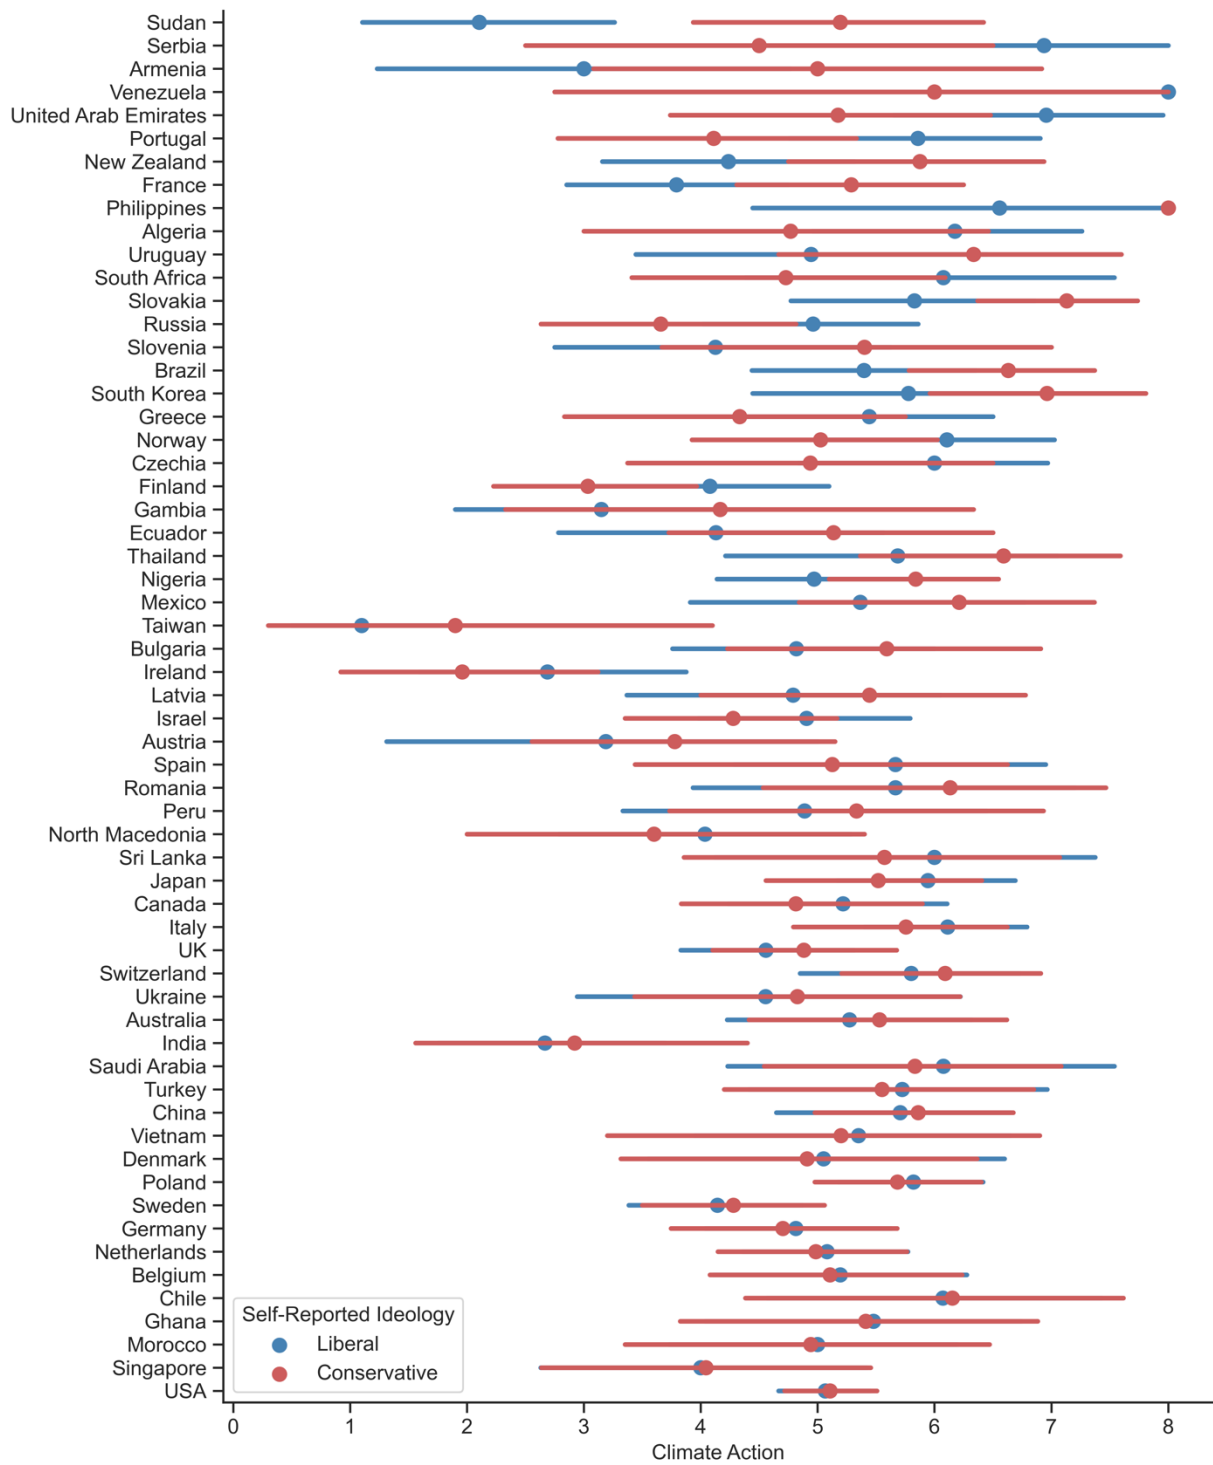

Fig S6. Means and 95% confidence intervals around the means of the climate action raw scores of self-reported liberals (in blue) and conservatives (in red), by country.

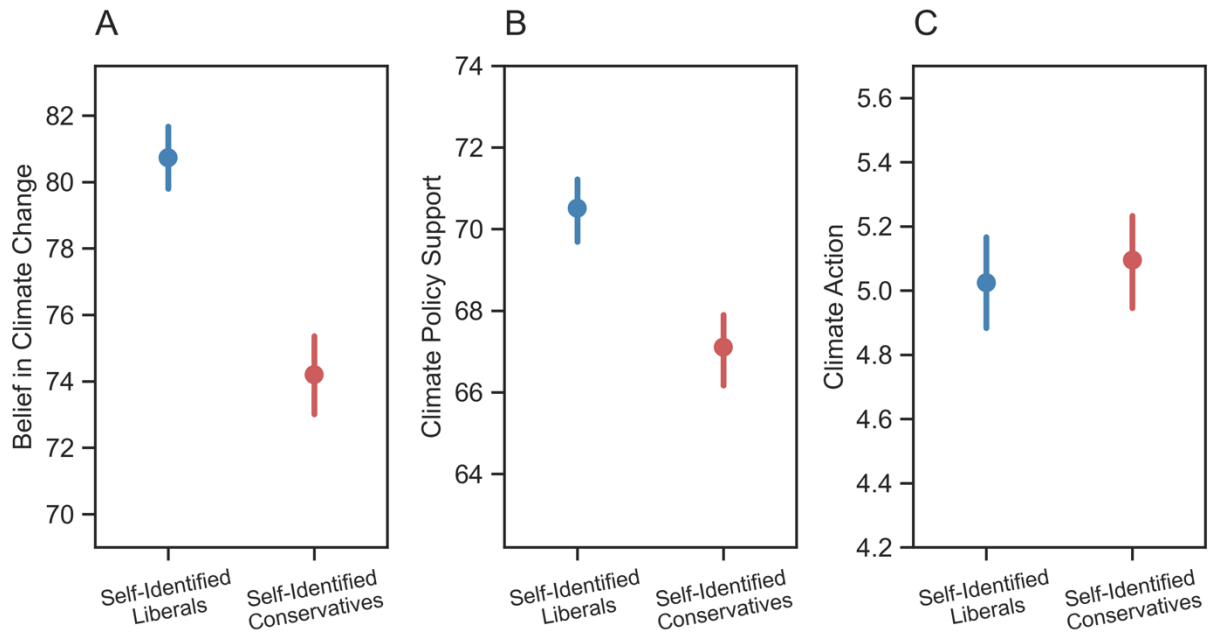

Fig S7. Belief in climate change (Panel A), climate policy support (Panel B), and climate action (Panel C) as a function of participants' self-reported political ideology (liberals versus conservatives), computed as a median split within country of the continuous ideology measure.



|                       | Climate Beliefs  |                       | Climate Policy Support |                       | Climate Action   |                       |
|-----------------------|------------------|-----------------------|------------------------|-----------------------|------------------|-----------------------|
|                       | Self-ID Liberals | Self-ID Conservatives | Self-ID Liberals       | Self-ID Conservatives | Self-ID Liberals | Self-ID Conservatives |
| Psych. Distance       | ✓                | ✓                     | ✓                      |                       | ✗                | ✗                     |
| Letter to Future Gen. |                  | ✓                     | ✓                      | ✓                     | ✗                | ✗                     |
| Collective Action     | ✓                | ✓                     | ✓                      | ✓                     |                  | ✗                     |
| Future-Self Cont.     | ✓                | ✓                     | ✓                      | ✓                     |                  | ✗                     |
| Neg. Emotions         |                  |                       |                        | ✗                     | ✗                | ✗                     |
| System Justification  | ✓                | ✓                     |                        |                       |                  | ✗                     |
| Sci. Consensus        |                  |                       |                        |                       | ✓                |                       |
| Binding Moral Found.  |                  |                       |                        |                       |                  |                       |
| Dynamic Norms         |                  |                       |                        |                       |                  |                       |
| Pluralistic Ignorance |                  |                       |                        |                       |                  | ✗                     |
| Work Together Norm    |                  |                       |                        |                       | ✗                | ✗                     |

Figure S8. Results of linear mixed effects models with climate outcomes (climate beliefs, policy support, and action) as the dependent variable, condition (11 interventions versus control) as it interacts with self-reported political ideology (here split by midpoint on ideology scales) as the fixed effects, including by-participant and by-country random effects. The green check marks indicate statistically significant increases compared to control, and the red X marks indicate statistically significant decreases compared to control, and empty cells indicate no statistically significant differences compared to control.

## 1. Supplementary Tables

Table S1. Interventions' effects on self-identified liberals' climate beliefs, compared to the control condition. Analysis was conducted using only self-identified liberals' data (using a per-country median split of the continuous ideology measure). Statistical analysis was performed using a linear mixed effects model with condition as a fixed effect, and by-participant, by-country, and by-item (i.e., 4 beliefs) random effects. Tests on fixed effects are two-tailed, and no adjustments for multiple comparisons were made.

| Intervention     | Estimate | <i>SE</i> | <i>df</i> | <i>t</i> | <i>p</i> | 95% CI         | Cohen's <i>d</i> |
|------------------|----------|-----------|-----------|----------|----------|----------------|------------------|
| (Intercept)      | 81.32    | 1.00      | 74.68     | 81.22    | < .001   | [79.33, 83.31] | 18.80            |
| PsychDistance    | 2.79     | 0.67      | 25343.92  | 4.17     | < .001   | [1.48, 4.10]   | 0.05             |
| FutureSelfCont   | 2.12     | 0.69      | 25341.28  | 3.08     | .002     | [0.77, 3.47]   | 0.04             |
| SystemJust       | 1.91     | 0.65      | 25339.41  | 2.95     | .003     | [0.64, 3.18]   | 0.04             |
| CollectAction    | 1.80     | 0.65      | 25336.96  | 2.76     | .006     | [0.53, 3.07]   | 0.03             |
| BindingMoral     | 1.39     | 0.65      | 25341.90  | 2.13     | .033     | [0.12, 2.66]   | 0.03             |
| LetterFutureGen  | 1.47     | 0.70      | 25346.89  | 2.11     | .035     | [0.10, 2.84]   | 0.03             |
| SciConsens       | 1.22     | 0.65      | 25337.74  | 1.88     | .060     | [-0.05, 2.49]  | 0.02             |
| PluralIgnorance  | 0.67     | 0.65      | 25336.83  | 1.03     | .305     | [-0.60, 1.94]  | 0.01             |
| NegativeEmotions | 0.59     | 0.64      | 25336.42  | 0.92     | .358     | [-0.66, 1.84]  | 0.01             |
| DynamicNorm      | 0.55     | 0.65      | 25339.98  | 0.85     | .394     | [-0.72, 1.82]  | 0.01             |
| WorkTogetherNorm | -0.72    | 0.65      | 25338.41  | -1.10    | .270     | [-1.99, 0.55]  | 0.01             |

Table S2. Interventions' effects on self-identified conservatives' climate beliefs, compared to the control condition. Analysis was conducted using only self-identified conservatives' data (using a per-country median split of the continuous ideology measure). Statistical analysis was performed using a linear mixed effects model with condition as a fixed effect, and by-participant, by-country, and by-item (i.e., 4 beliefs) random effects. Tests on fixed effects are two-tailed, and no adjustments for multiple comparisons were made.

| Intervention     | Estimate | <i>SE</i> | <i>df</i> | <i>t</i> | <i>p</i> | 95% <i>C.I.</i> | Cohen's <i>d</i> |
|------------------|----------|-----------|-----------|----------|----------|-----------------|------------------|
| (Intercept)      | 78.44    | 1.11      | 99.89     | 70.93    | < .001   | [76.23, 80.65]  | 14.19            |
| PsychDistance    | 3.52     | 0.76      | 24331.56  | 4.61     | < .001   | [2.03, 5.01]    | 0.06             |
| CollectAction    | 2.58     | 0.75      | 24336.05  | 3.45     | < .001   | [1.11, 4.05]    | 0.04             |
| LetterFutureGen  | 2.44     | 0.80      | 24331.44  | 3.05     | .002     | [0.87, 4.01]    | 0.04             |
| FutureSelfCont   | 1.58     | 0.79      | 24332.33  | 2.00     | .045     | [0.032, 3.13]   | 0.03             |
| SystemJust       | 1.48     | 0.75      | 24333.48  | 1.98     | .048     | [0.01, 2.95]    | 0.03             |
| SciConsens       | 1.12     | 0.74      | 24332.59  | 1.51     | .132     | [-0.33, 2.57]   | 0.02             |
| BindingMoral     | 0.92     | 0.75      | 24332.56  | 1.23     | .218     | [-0.55, 2.39]   | 0.02             |
| NegativeEmotions | 0.52     | 0.76      | 24330.14  | 0.68     | .495     | [-0.97, 2.00]   | < 0.001          |
| PluralIgnorance  | 0.51     | 0.74      | 24329.44  | 0.68     | .494     | [-0.94, 1.96]   | < 0.001          |
| DynamicNorm      | 0.36     | 0.75      | 24337.24  | 0.49     | .628     | [-1.11, 1.83]   | < 0.001          |
| WorkTogetherNorm | -0.33    | 0.75      | 24329.61  | -0.44    | .657     | [-1.8, 1.14]    | < 0.001          |

Table S3. Interventions' effects on self-identified liberals' climate policy support, compared to the control condition. Analysis was conducted using only self-identified liberals' data (using a per-country median split of the continuous ideology measure). Statistical analysis was performed using a linear mixed effects model with condition as a fixed effect, and by-participant, by-country, and by-item (i.e., 9 policies) random effects. Tests on fixed effects are two-tailed, and no adjustments for multiple comparisons were made.

| Intervention     | Estimate | <i>SE</i> | <i>df</i> | <i>t</i> | <i>p</i> | 95% <i>C.I.</i> | Cohen's <i>d</i> |
|------------------|----------|-----------|-----------|----------|----------|-----------------|------------------|
| (Intercept)      | 70.84    | 4.15      | 8.56      | 17.06    | <.001    | [62.58, 79.10]  | 11.66            |
| CollectiveAction | 3.01     | 0.56      | 25156.57  | 5.40     | <.001    | [1.91, 4.11]    | 0.07             |
| LetterFuture     | 2.59     | 0.60      | 25179.85  | 4.34     | <.001    | [1.41, 3.77]    | 0.05             |
| FutureSelfCont   | 1.95     | 0.59      | 25182.39  | 3.31     | .001     | [0.79, 3.11]    | 0.04             |
| PsychDistance    | 1.73     | 0.57      | 25204.65  | 3.02     | .003     | [0.61, 2.85]    | 0.04             |
| SystemJust       | 1.34     | 0.55      | 25173.50  | 2.42     | .015     | [0.26, 2.42]    | 0.03             |
| DynamicNorm      | 0.77     | 0.55      | 25180.65  | 1.40     | .163     | [-0.31, 1.85]   | 0.02             |
| BindingMoral     | 0.66     | 0.56      | 25167.53  | 1.19     | .234     | [-0.44, 1.76]   | 0.01             |
| SciConsensus     | 0.44     | 0.55      | 25188.94  | 0.79     | .428     | [-0.64, 1.52]   | < 0.001          |
| NegativeEmotions | 0.29     | 0.55      | 25179.09  | 0.53     | .599     | [-0.79, 1.37]   | < 0.001          |
| PluralIgnorance  | -0.12    | 0.55      | 25170.33  | -0.21    | .834     | [-1.20, 0.96]   | < 0.001          |
| WorkTogetherNorm | -0.19    | 0.56      | 25199.81  | -0.34    | .733     | [-1.29, 0.91]   | < 0.001          |

Table S4. Interventions' effects on self-identified conservatives' climate policy support, compared to the control condition. Analysis was conducted using only self-identified conservatives' data (using a per-country median split of the continuous ideology measure). Statistical analysis was performed using a linear mixed effects model with condition as a fixed effect, and by-participant, by-country, and by-item (i.e., 9 policies) random effects. Tests are two-tailed, and no adjustments for multiple comparisons were made.

| Intervention     | Estimate | <i>SE</i> | <i>df</i> | <i>t</i> | <i>p</i> | 95% <i>C.I.</i> | Cohen's <i>d</i> |
|------------------|----------|-----------|-----------|----------|----------|-----------------|------------------|
| (Intercept)      | 70.07    | 4.07      | 8.93      | 17.23    | <.001    | [60.86, 79.28]  | 11.53            |
| LetterFuture     | 2.83     | 0.63      | 24225.55  | 4.51     | <.001    | [1.60, 4.06]    | 0.06             |
| CollectiveAction | 2.65     | 0.59      | 24212.56  | 4.51     | <.001    | [1.49, 3.80]    | 0.06             |
| FutureSelfCont   | 1.60     | 0.62      | 24225.32  | 2.58     | .010     | [0.38, 2.82]    | 0.03             |
| SciConsensus     | 0.91     | 0.58      | 24240.60  | 1.56     | .120     | [-0.23, 2.05]   | 0.02             |
| PsychDistance    | 1.04     | 0.60      | 24246.45  | 1.73     | .084     | [-0.14, 2.21]   | 0.02             |
| DynamicNorm      | 0.63     | 0.59      | 24233.66  | 1.08     | .282     | [-0.52, 1.79]   | 0.01             |
| BindingMoral     | 0.55     | 0.59      | 24218.82  | 0.93     | .355     | [-0.61, 1.71]   | 0.01             |
| PluralIgnorance  | 0.36     | 0.58      | 24221.30  | 0.61     | .542     | [-0.78, 1.50]   | 0.01             |
| SystemJust       | 0.37     | 0.59      | 24221.61  | 0.62     | .536     | [-0.79, 1.53]   | 0.01             |
| WorkTogetherNorm | -0.21    | 0.59      | 24225.40  | -0.35    | .727     | [-1.37, 0.95]   | -0.004           |
| NegativeEmotions | -1.22    | 0.60      | 24208.00  | -2.04    | .041     | [-2.40, -0.04]  | -0.03            |

Table S5. Interventions' effects on self-identified liberals' actions on tree planting task, compared to the control condition. Analysis was conducted using only self-identified liberals' data (using a per-country median split of the continuous ideology measure). Statistical analysis was performed using an ordinal mixed model (i.e., cumulative link mixed model fitted with the Laplace approximation) with condition as a fixed effect, and by-country random effects. Tests are two-tailed, and no adjustments for multiple comparisons were made.

| Intervention     | Estimate | <i>SE</i> | <i>z</i> | <i>p</i> | 95% <i>C.I.</i> | Cohen's <i>d</i> |
|------------------|----------|-----------|----------|----------|-----------------|------------------|
| SciConsensus     | 0.12     | 0.06      | 2.05     | .040     | [0.002, 0.24]   | 0.06             |
| BindingMoral     | 0.10     | 0.06      | 1.77     | .077     | [-0.02, 0.22]   | 0.06             |
| DynamicNorm      | 0.10     | 0.06      | 1.72     | .085     | [-0.02, 0.22]   | 0.05             |
| SystemJust       | 0.02     | 0.06      | 0.36     | .717     | [-0.10, 0.14]   | 0.01             |
| FutureSelfCont   | -0.01    | 0.06      | -0.11    | .911     | [-0.13, 0.11]   | -0.00            |
| PluralIgnorance  | -0.03    | 0.06      | -0.60    | .552     | [-0.15, 0.09]   | -0.02            |
| CollectiveAction | -0.06    | 0.06      | -1.14    | .254     | [-0.18, 0.06]   | -0.04            |
| WorkTogetherNorm | -0.15    | 0.06      | -2.69    | .007     | [-0.27, -0.03]  | -0.08            |
| LetterFuture     | -0.17    | 0.06      | -2.87    | .004     | [-0.29, -0.05]  | -0.10            |
| PsychDistance    | -0.21    | 0.06      | -3.68    | <.001    | [-0.33, -0.09]  | -0.12            |
| NegativeEmotions | -0.25    | 0.06      | -4.50    | <.001    | [-0.37, -0.13]  | -0.14            |

Table S6. Interventions' effects on self-identified conservatives' actions on tree planting task, compared to the control condition. Analysis was conducted using only self-identified conservatives' data (using a per-country median split of the continuous ideology measure). Statistical analysis was performed using an ordinal mixed model (i.e., cumulative link mixed model fitted with the Laplace approximation) with condition as a fixed effect, and by-country random effects. Tests are two-tailed, and no adjustments for multiple comparisons were made.

| Intervention     | Estimate | <i>SE</i> | <i>z</i> | <i>p</i> | 95% <i>C.I.</i> | Cohen's <i>d</i> |
|------------------|----------|-----------|----------|----------|-----------------|------------------|
| BindingMoral     | -0.03    | 0.06      | -0.49    | .622     | [-0.15, 0.09]   | -0.02            |
| SciConsensus     | -0.06    | 0.06      | -0.99    | .321     | [-0.18, 0.06]   | -0.03            |
| DynamicNorm      | -0.10    | 0.06      | -1.73    | .084     | [-0.22, 0.02]   | -0.06            |
| PluralIgnorance  | -0.12    | 0.06      | -2.11    | .035     | [-0.24, -0.002] | -0.07            |
| SystemJust       | -0.15    | 0.06      | -2.52    | .012     | [-0.27, -0.03]  | -0.08            |
| CollectiveAction | -0.15    | 0.06      | -2.49    | .013     | [-0.27, -0.03]  | -0.08            |
| FutureSelfCont   | -0.21    | 0.06      | -3.45    | <.001    | [-0.33, -0.09]  | -0.12            |
| LetterFuture     | -0.32    | 0.06      | -5.19    | <.001    | [-0.44, -0.20]  | -0.18            |
| NegativeEmotions | -0.35    | 0.06      | -5.98    | <.001    | [-0.47, -0.23]  | -0.20            |
| WorkTogetherNorm | -0.37    | 0.06      | -6.45    | <.001    | [-0.49, -0.25]  | -0.21            |
| PsychDistance    | -0.35    | 0.06      | -5.86    | <.001    | [-0.47, -0.23]  | -0.19            |

Table S7. Results of a linear mixed effects model with beliefs in climate change as the dependent variable, condition (11 interventions versus control) as it interacts with self-reported political ideology (median split within each country) as the fixed effects, including by-participant and by-country random effects.

| Fixed Effect               | Estimate | SE   | df     | t     | p     | 95% C.I.       | Cohen's d |
|----------------------------|----------|------|--------|-------|-------|----------------|-----------|
| (Intercept)                | 76.68    | 0.92 | 117.18 | 83.44 | <.001 | [74.88, 78.48] | 15.43     |
| Ideology                   | 6.35     | 0.71 | 49720  | 8.89  | <.001 | [4.96, 7.74]   | 0.08      |
| PsychDistance              | 3.20     | 0.73 | 49720  | 4.40  | <.001 | [1.77, 4.63]   | 0.04      |
| CollectiveAction           | 2.62     | 0.71 | 49730  | 3.68  | <.001 | [1.23, 4.01]   | 0.03      |
| LetterFuture               | 2.64     | 0.76 | 49720  | 3.46  | <.001 | [1.15, 4.13]   | 0.03      |
| FutureSelfCont             | 1.57     | 0.75 | 49720  | 2.09  | .037  | [0.10, 3.04]   | 0.02      |
| SystemJust                 | 1.40     | 0.72 | 49730  | 1.95  | .051  | [-0.01, 2.81]  | 0.02      |
| SciConsensus               | 1.08     | 0.71 | 49730  | 1.52  | .130  | [-0.31, 2.47]  | 0.01      |
| BindingMoral               | 0.87     | 0.72 | 49720  | 1.22  | .244  | [-0.54, 2.28]  | 0.01      |
| PluralIgnorance            | 0.60     | 0.71 | 49720  | 0.85  | .396  | [-0.79, 1.99]  | < 0.001   |
| DynamicNorm                | 0.41     | 0.71 | 49730  | 0.58  | .563  | [-0.98, 1.80]  | < 0.001   |
| NegativeEmotions           | 0.38     | 0.73 | 49720  | 0.52  | .602  | [-1.05, 1.81]  | < 0.001   |
| WorkTogetherNorm           | -0.26    | 0.71 | 49720  | -0.36 | .717  | [-1.65, 1.13]  | < 0.001   |
| BindingMoral: Ideology     | 0.60     | 1.00 | 49720  | 0.60  | .551  | [-1.36, 2.56]  | < 0.001   |
| FutureSelfCont: Ideology   | 0.59     | 1.06 | 49720  | 0.56  | .575  | [-1.49, 2.67]  | < 0.001   |
| DynamicNorm: Ideology      | 0.31     | 1.00 | 49730  | 0.31  | .756  | [-1.65, 2.27]  | < 0.001   |
| NegativeEmotions: Ideology | 0.24     | 1.00 | 49720  | 0.24  | .812  | [-1.72, 2.20]  | < 0.001   |
| SystemJust: Ideology       | 0.48     | 1.00 | 49720  | 0.48  | .634  | [-1.48, 2.44]  | < 0.001   |
| SciConsensus: Ideology     | 0.16     | 1.00 | 49720  | 0.16  | .874  | [-1.80, 2.12]  | < 0.001   |
| PluralIgnorance: Ideology  | 0.22     | 1.00 | 49720  | 0.22  | .822  | [-1.74, 2.18]  | < 0.001   |
| CollectiveAction: Ideology | -0.70    | 1.00 | 49720  | -0.69 | .488  | [-2.66, 1.26]  | < 0.001   |
| WorkTogetherNorm: Ideology | -0.44    | 1.00 | 49720  | -0.44 | .658  | [-2.40, 1.52]  | < 0.001   |
| PsychDistance: Ideology    | -0.13    | 1.03 | 49720  | -0.13 | .899  | [-2.15, 1.89]  | < 0.001   |
| LetterFuture: Ideology     | -1.14    | 1.07 | 49730  | -1.07 | .286  | [-3.24, 0.96]  | < 0.001   |



Table S8. Results of a linear mixed effects model with climate policy support as the dependent variable, condition (11 interventions versus control) as it interacts with self-reported political ideology (median split within each country) as the fixed effects, including by-participant and by-country random effects. Tests are two-tailed, and no adjustments for multiple comparisons were made.

| Fixed Effect               | Estimate | SE   | df    | t     | p     | 95% C.I.       | Cohen's d |
|----------------------------|----------|------|-------|-------|-------|----------------|-----------|
| (Intercept)                | 68.96    | 0.76 | 116.1 | 90.64 | <.001 | [67.47, 70.45] | 16.83     |
| Ideology                   | 3.36     | 0.58 | 50280 | 5.80  | <.001 | [2.22, 4.50]   | 0.05      |
| LetterFuture               | 3.06     | 0.62 | 50270 | 4.90  | <.001 | [1.85, 4.28]   | 0.04      |
| CollectiveAction           | 2.72     | 0.58 | 50230 | 4.66  | <.001 | [1.58, 3.86]   | 0.04      |
| FutureSelfCont             | 1.61     | 0.62 | 50260 | 2.61  | .009  | [0.40, 2.83]   | 0.02      |
| SciConsensus               | 0.92     | 0.58 | 50300 | 1.58  | .114  | [-0.22, 2.06]  | 0.01      |
| PsychDistance              | 0.87     | 0.60 | 50310 | 1.47  | .143  | [-0.31, 2.05]  | 0.01      |
| DynamicNorm                | 0.75     | 0.58 | 50280 | 1.29  | .198  | [-0.39, 1.89]  | 0.01      |
| PluralIgnorance            | 0.48     | 0.58 | 50260 | 0.84  | .404  | [-0.66, 1.62]  | < 0.001   |
| BindingMoral               | 0.52     | 0.59 | 50250 | 0.89  | .374  | [-0.64, 1.68]  | < 0.001   |
| SystemJust                 | 0.31     | 0.59 | 50250 | 0.53  | .596  | [-0.85, 1.47]  | < 0.001   |
| WorkTogetherNorm           | -0.13    | 0.58 | 50270 | -0.23 | .821  | [-1.27, 1.01]  | < 0.001   |
| NegativeEmotions           | -1.31    | 0.59 | 50220 | -2.21 | .027  | [-2.47, -0.15] | < 0.001   |
| NegativeEmotions: Ideology | 1.74     | 0.81 | 50260 | 2.13  | .033  | [0.15, 3.33]   | < 0.001   |
| SystemJust: Ideology       | 0.92     | 0.81 | 50280 | 1.14  | .255  | [-0.67, 2.51]  | < 0.001   |
| PsychDistance: Ideology    | 1.01     | 0.83 | 50340 | 1.22  | .224  | [-0.62, 2.64]  | < 0.001   |
| DynamicNorm: Ideology      | 0.27     | 0.81 | 50300 | 0.34  | .737  | [-1.32, 1.86]  | < 0.001   |
| FutureSelfCont: Ideology   | 0.58     | 0.86 | 50290 | 0.68  | .498  | [-1.11, 2.27]  | < 0.001   |
| CollectiveAction: Ideology | 0.24     | 0.81 | 50250 | 0.29  | .769  | [-1.35, 1.83]  | < 0.001   |
| BindingMoral: Ideology     | 0.16     | 0.81 | 50270 | 0.20  | .845  | [-1.43, 1.75]  | < 0.001   |
| WorkTogetherNorm: Ideology | 0.01     | 0.81 | 50320 | 0.01  | .994  | [-1.58, 1.60]  | < 0.001   |
| LetterFuture: Ideology     | -0.48    | 0.87 | 50290 | -0.55 | .581  | [-2.19, 1.23]  | < 0.001   |
| PluralIgnorance: Ideology  | -0.37    | 0.81 | 50280 | -0.46 | .646  | [-1.96, 1.22]  | < 0.001   |
| SciConsensus: Ideology     | -0.41    | 0.81 | 50320 | -0.50 | .614  | [-2.00, 1.18]  | < 0.001   |

Table S9. Results of an ordinal mixed model with number of trees planted in the behavioral task as the dependent variable, condition (11 interventions versus control) as it interacts with self-reported political ideology (median split within each country) as the fixed effects, including by-country random effects. Tests are two-tailed, and no adjustments for multiple comparisons were made.

| Fixed Effect              | Estimate | SE   | <i>z</i> | <i>p</i> | 95% <i>C.I.</i> | Cohen's <i>d</i> |
|---------------------------|----------|------|----------|----------|-----------------|------------------|
| Ideology                  | -0.04    | 0.06 | -0.71    | .481     | [-0.16, 0.08]   | 0.02             |
| BindingMoral              | -0.03    | 0.06 | -0.47    | .641     | [-0.15, 0.09]   | 0.02             |
| SciConsens                | -0.06    | 0.06 | -1.06    | .291     | [-0.18, 0.06]   | 0.04             |
| DynamicNorm               | -0.1     | 0.06 | -1.71    | .089     | [-0.22, 0.02]   | 0.06             |
| PluralIgnorance           | -0.12    | 0.06 | -2.11    | .035     | [-0.24, -0.002] | 0.07             |
| CollectAction             | -0.15    | 0.06 | -2.47    | .013     | [-0.27, -0.03]  | 0.08             |
| SystemJust                | -0.15    | 0.06 | -2.48    | .013     | [-0.27, -0.03]  | 0.08             |
| FutureSelfCont            | -0.21    | 0.06 | -3.43    | <.001    | [-0.33, -0.09]  | 0.11             |
| LetterFuture              | -0.32    | 0.06 | -5.18    | <.001    | [-0.44, -0.20]  | 0.17             |
| NegativeEmotions          | -0.36    | 0.06 | -5.99    | <.001    | [-0.48, -0.24]  | 0.20             |
| PsychDistance             | -0.37    | 0.06 | -6.09    | <.001    | [-0.49, -0.25]  | 0.20             |
| WorkTogetherNorm          | -0.37    | 0.06 | -6.40    | <.001    | [-0.49, -0.25]  | 0.21             |
| WorkTogetherNorm:Ideology | 0.22     | 0.08 | 2.66     | .008     | [0.06, 0.38]    | 0.11             |
| DynamicNorm:Ideology      | 0.19     | 0.08 | 2.34     | .019     | [0.03, 0.35]    | 0.10             |
| FutureSelfCont:Ideology   | 0.2      | 0.09 | 2.29     | .022     | [0.02, 0.38]    | 0.11             |
| SciConsens:Ideology       | 0.17     | 0.08 | 2.05     | .040     | [0.01, 0.33]    | 0.09             |
| SystemJust:Ideology       | 0.16     | 0.08 | 1.93     | .053     | [0.003, 0.32]   | 0.09             |
| PsychDistance:Ideology    | 0.16     | 0.08 | 1.92     | .054     | [0.003, 0.32]   | 0.09             |
| LetterFuture:Ideology     | 0.15     | 0.09 | 1.72     | .088     | [-0.03, 0.33]   | 0.08             |
| BindingMoral:Ideology     | 0.12     | 0.08 | 1.48     | .139     | [-0.04, 0.28]   | 0.07             |
| NegativeEmotions:Ideology | 0.11     | 0.08 | 1.33     | .183     | [-0.05, 0.27]   | 0.06             |
| PluralIgnorance:Ideology  | 0.09     | 0.08 | 1.05     | .294     | [-0.07, 0.25]   | 0.05             |
| CollectAction:Ideology    | 0.08     | 0.08 | 0.91     | .361     | [-0.08, 0.24]   | 0.04             |

Table S10. Results from an ordinal mixed model with number of trees planted in the WEPT as the outcome, the interaction of condition and self-reported ideology as the fixed effect, condition time as a fixed effect, with by-country random intercepts. Tests are two-tailed, and no adjustments for multiple comparisons were made.

| Fixed Effect              | Estimate | SE      | <i>z</i> | <i>p</i> | 95% <i>C.I.</i>  | Cohen's <i>d</i> |
|---------------------------|----------|---------|----------|----------|------------------|------------------|
| Time                      | 0.0008   | 0.00005 | 17.71    | < .001   | [0.0007, 0.0009] | < 0.001          |
| Ideology                  | -0.08    | 0.06    | -1.38    | .169     | [-0.20, 0.04]    | 0.05             |
| BindingMoral              | 0.19     | 0.06    | 3.16     | .002     | [0.07, 0.31]     | 0.10             |
| SciConsens                | 0.14     | 0.06    | 2.41     | .016     | [0.02, 0.26]     | 0.08             |
| PluralIgnorance           | 0.05     | 0.06    | 0.89     | .375     | [-0.07, 0.17]    | 0.03             |
| DynamicNorm               | 0.05     | 0.06    | 0.78     | .436     | [-0.07, 0.17]    | 0.03             |
| SystemJust                | -0.02    | 0.06    | -0.34    | .735     | [-0.14, 0.10]    | 0.01             |
| CollectAction             | -0.13    | 0.06    | -2.25    | .025     | [-0.25, -0.01]   | 0.07             |
| FutureSelfCont            | -0.30    | 0.06    | -4.87    | < .001   | [-0.42, -0.18]   | 0.16             |
| WorkTogetherNorm          | -0.32    | 0.06    | -5.52    | < .001   | [-0.44, -0.20]   | 0.18             |
| NegativeEmotions          | -0.38    | 0.06    | -6.38    | < .001   | [-0.50, -0.26]   | 0.21             |
| PsychDistance             | -0.45    | 0.06    | -7.58    | < .001   | [-0.57, -0.33]   | 0.25             |
| LetterFutureGen           | -0.50    | 0.06    | -8.01    | < .001   | [-0.62, -0.38]   | 0.26             |
| DynamicNorm:Ideology      | 0.25     | 0.08    | 3.02     | .003     | [0.09, 0.41]     | 0.13             |
| WorkTogetherNorm:Ideology | 0.24     | 0.08    | 2.98     | .003     | [0.08, 0.40]     | 0.13             |
| FutureSelfCont:Ideology   | 0.23     | 0.09    | 2.64     | .008     | [0.05, 0.41]     | 0.13             |
| SciConsens:Ideology       | 0.20     | 0.08    | 2.49     | .013     | [0.04, 0.36]     | 0.11             |
| SystemJust:Ideology       | 0.19     | 0.08    | 2.29     | .022     | [0.03, 0.35]     | 0.10             |
| PsychDistance:Ideology    | 0.17     | 0.08    | 2.08     | .038     | [0.01, 0.33]     | 0.09             |
| BindingMoral:Ideology     | 0.16     | 0.08    | 1.93     | .053     | [0.003, 0.32]    | 0.09             |
| LetterFutureGen:Ideology  | 0.16     | 0.09    | 1.81     | .071     | [-0.02, 0.34]    | 0.09             |
| NegativeEmotions:Ideology | 0.14     | 0.08    | 1.77     | .077     | [-0.02, 0.30]    | 0.08             |
| CollectAction:Ideology    | 0.12     | 0.08    | 1.48     | .140     | [-0.04, 0.28]    | 0.07             |
| PluralIgnorance:Ideology  | 0.12     | 0.08    | 1.44     | .149     | [-0.04, 0.28]    | 0.06             |

Table S11. Results from ordinal mixed model with trees planted in the WEPT as outcome, the interaction of intervention time and condition as the fixed effect, with by-country random intercepts. Tests are two-tailed, and no adjustments for multiple comparisons were made.

| Fixed Effect           | Estimate | SE     | <i>z</i> | <i>p</i> | 95% <i>C.I.</i>  | Cohen's <i>d</i> |
|------------------------|----------|--------|----------|----------|------------------|------------------|
| Time                   | 0.002    | 0.0001 | 10.921   | < .001   | [0.002, 0.002]   | < 0.001          |
| SciConsens             | 0.449    | 0.063  | 7.108    | < .001   | [0.33, 0.57]     | 0.25             |
| DynamicNorm            | 0.428    | 0.064  | 6.727    | < .001   | [0.30, 0.55]     | 0.24             |
| PluralIgnorance        | 0.411    | 0.062  | 6.636    | < .001   | [0.29, 0.53]     | 0.23             |
| SystemJust             | 0.371    | 0.064  | 5.821    | < .001   | [0.25, 0.50]     | 0.21             |
| CollectAction          | 0.196    | 0.066  | 2.977    | .003     | [0.07, 0.33]     | 0.11             |
| WorkTogetherNorm       | 0.189    | 0.066  | 2.858    | .004     | [0.06, 0.32]     | 0.10             |
| FutureSelfCont         | 0.165    | 0.068  | 2.414    | .016     | [0.032, 0.30]    | 0.09             |
| NegativeEmotions       | 0.060    | 0.067  | 0.897    | .370     | [-0.07, 0.19]    | 0.03             |
| LetterFutureGen        | -0.021   | 0.073  | -0.285   | .775     | [-0.16, 0.12]    | 0.01             |
| PsychDistance          | -0.106   | 0.071  | -1.495   | .135     | [-0.25, 0.03]    | 0.06             |
| BindingMoral           | -0.688   | 0.062  | -11.052  | < .001   | [-0.81, -0.57]   | 0.38             |
| BindingMoral:Time      | 0.804    | 0.021  | 37.410   | < .001   | [0.76, 0.85]     | 0.43             |
| SciConsens:Time        | 0.003    | 0.001  | 2.748    | .006     | [0.001, 0.005]   | 0.002            |
| DynamicNorm: Time      | -0.0004  | 0.0004 | -1.202   | .229     | [-0.001, 0.0004] | < 0.001          |
| PluralIgnorance: Time  | -0.001   | 0.001  | -2.539   | .011     | [-0.003, -0.001] | 0.001            |
| SystemJust: Time       | -0.001   | 0.001  | -3.914   | < .001   | [-0.003, -0.001] | 0.002            |
| CollectAction: Time    | -0.001   | 0.001  | -4.403   | < .001   | [-0.003, -0.001] | 0.002            |
| PsychDistance: Time    | -0.001   | 0.001  | -4.910   | < .001   | [-0.003, -0.001] | 0.003            |
| NegativeEmotions: Time | -0.001   | 0.001  | -6.385   | < .001   | [-0.003, -0.001] | 0.004            |
| LetterFutureGen: Time  | -0.001   | 0.001  | -6.472   | < .001   | [-0.003, -0.001] | 0.004            |
| FutureSelfCont: Time   | -0.001   | 0.001  | -6.501   | < .001   | [-0.003, -0.001] | 0.004            |
| WorkTogetherNorm: Time | -0.002   | 0.001  | -6.571   | < .001   | [-0.003, -0.001] | 0.004            |

Table S12. Results from exploratory analysis assessing interaction of age and self-reported political ideology on outcome measures in the control condition (climate change beliefs, policy support, and WEPT performance) from linear mixed models (beliefs, policy support) and ordinal mixed model (WEPT) with self-reported ideology and age as fixed effects (mean-centered) allowing these factors to interact, with by-country random intercepts.

| Outcome        | Ideology:Age Estimate | SE     | Test Statistic   | <i>p</i> | 95% <i>C.I.</i>   | Cohen's <i>d</i> |
|----------------|-----------------------|--------|------------------|----------|-------------------|------------------|
| Beliefs        | -0.006                | 0.0001 | <i>t</i> = -6.45 | < .001   | [-0.007, -0.006]  | 0.21             |
| Policy Support | -0.005                | 0.001  | <i>t</i> = -5.92 | < .001   | [-0.007, -0.003]  | 0.19             |
| WEPT           | 0.00007               | 0.0001 | <i>z</i> = 0.82  | .414     | [-0.0001, 0.0003] | < 0.001          |

Table S13. Interventions' effects on self-identified liberals' climate sharing intentions, compared to the control condition. Tests are two-tailed, and no adjustments for multiple comparisons were made.

| Fixed Effect     | Estimate | SE   | <i>z</i> | <i>p</i> | 95% <i>C.I.</i> | Cohen's <i>d</i> |
|------------------|----------|------|----------|----------|-----------------|------------------|
| (Intercept)      | -0.16    | 0.14 | -1.12    | .262     | [-0.43, 0.11]   | 0.09             |
| NegativeEmotions | 0.65     | 0.08 | 8.47     | < .001   | [0.49, 0.81]    | 0.37             |
| CollectAction    | 0.52     | 0.08 | 6.65     | < .001   | [0.36, 0.68]    | 0.29             |
| FutureSelfCont   | 0.48     | 0.08 | 5.90     | < .001   | [0.32, 0.64]    | 0.26             |
| PsychDistance    | 0.46     | 0.08 | 5.82     | < .001   | [0.30, 0.62]    | 0.26             |
| LetterFutureGen  | 0.46     | 0.08 | 5.59     | < .001   | [0.30, 0.62]    | 0.25             |
| SystemJust       | 0.37     | 0.08 | 4.80     | < .001   | [0.21, 0.53]    | 0.21             |
| DynamicNorm      | 0.32     | 0.08 | 4.23     | < .001   | [0.16, 0.48]    | 0.19             |
| WorkTogetherNorm | 0.32     | 0.08 | 4.21     | < .001   | [0.16, 0.48]    | 0.19             |
| BindingMoral     | 0.20     | 0.08 | 2.62     | < .001   | [0.04, 0.36]    | 0.12             |
| SciConsens       | 0.19     | 0.08 | 2.54     | .011     | [0.03, 0.35]    | 0.11             |
| PluralIgnorance  | 0.19     | 0.08 | 2.51     | .012     | [-0.05, 0.43]   | 0.11             |

Table S14. Interventions' effects on self-identified conservatives' climate sharing intentions, compared to the control condition. Tests are two-tailed, and no adjustments for multiple comparisons were made.

| Fixed Effect     | Estimate | SE   | <i>z</i> | <i>p</i> | 95% <i>C.I.</i> | Cohen's <i>d</i> |
|------------------|----------|------|----------|----------|-----------------|------------------|
| (Intercept)      | 0.31     | 0.16 | 1.90     | .057     | [-0.004, 0.62]  | 0.17             |
| NegativeEmotions | 0.32     | 0.08 | 3.94     | < .001   | [0.16, 0.48]    | 0.17             |
| CollectAction    | 0.26     | 0.08 | 3.28     | < .001   | [0.10, 0.42]    | 0.14             |
| DynamicNorm      | 0.26     | 0.08 | 3.27     | .001     | [0.10, 0.42]    | 0.14             |
| PsychDistance    | 0.22     | 0.08 | 2.73     | .006     | [0.06, 0.38]    | 0.12             |
| BindingMoral     | 0.19     | 0.08 | 2.38     | .017     | [0.03, 0.35]    | 0.10             |
| SystemJust       | 0.16     | 0.08 | 2.02     | .043     | [0.003, 0.32]   | 0.09             |
| SciConsens       | 0.14     | 0.08 | 1.76     | .078     | [-0.02, 0.30]   | 0.08             |
| WorkTogetherNorm | 0.13     | 0.08 | 1.72     | .085     | [-0.03, 0.29]   | 0.08             |
| FutureSelfCont   | 0.12     | 0.08 | 1.46     | .145     | [-0.04, 0.28]   | 0.06             |
| PluralIgnorance  | -0.04    | 0.08 | -0.52    | .605     | [-0.20, 0.12]   | 0.02             |

Table S15. Results of a linear mixed effects model with climate sharing intentions as the dependent variable, condition (11 interventions versus control) as it interacts with self-reported political ideology (median split within each country) as the fixed effects, including by-participant and by-country random effects.

| Fixed Effect              | Estimate | SE   | <i>z</i> | <i>p</i> | 95% <i>C.I.</i> | Cohen's <i>d</i> |
|---------------------------|----------|------|----------|----------|-----------------|------------------|
| (Intercept)               | 0.27     | 0.15 | 1.79     | .073     | [-0.02, 0.56]   | 0.15             |
| Ideology                  | -0.42    | 0.08 | -5.36    | < .001   | [-0.58, -0.26]  | 0.24             |
| LetterFutureGen           | 0.34     | 0.08 | 4.04     | < .001   | [0.18, 0.50]    | 0.18             |
| NegativeEmotions          | 0.31     | 0.08 | 3.95     | < .001   | [0.15, 0.47]    | 0.17             |
| CollectAction             | 0.26     | 0.08 | 3.27     | .001     | [0.10, 0.42]    | 0.14             |
| DynamicNorm               | 0.25     | 0.08 | 3.27     | .001     | [0.09, 0.41]    | 0.14             |
| PsychDistance             | 0.23     | 0.08 | 2.86     | .004     | [0.07, 0.39]    | 0.13             |
| BindingMoral              | 0.18     | 0.08 | 2.36     | .018     | [0.02, 0.34]    | 0.10             |
| SystemJust                | 0.15     | 0.08 | 1.93     | .053     | [-0.01, 0.31]   | 0.09             |
| SciConsens                | 0.14     | 0.08 | 1.78     | .075     | [-0.02, 0.30]   | 0.08             |
| WorkTogetherNorm          | 0.14     | 0.08 | 1.78     | .076     | [-0.02, 0.30]   | 0.08             |
| FutureSelfCont            | 0.11     | 0.08 | 1.40     | .161     | [-0.05, 0.27]   | 0.06             |
| PluralIgnorance           | -0.04    | 0.08 | -0.49    | .626     | [-0.20, 0.12]   | 0.02             |
| FutureSelfCont:Ideology   | 0.39     | 0.11 | 3.32     | < .001   | [0.17, 0.61]    | 0.20             |
| NegativeEmotions:Ideology | 0.35     | 0.11 | 3.17     | .002     | [0.13, 0.57]    | 0.19             |
| CollectAction:Ideology    | 0.28     | 0.11 | 2.54     | .011     | [0.06, 0.50]    | 0.15             |
| PluralIgnorance:Ideology  | 0.24     | 0.11 | 2.22     | .026     | [0.02, 0.46]    | 0.13             |
| PsychDistance:Ideology    | 0.24     | 0.11 | 2.10     | .036     | [0.02, 0.46]    | 0.13             |
| SystemJust:Ideology       | 0.23     | 0.11 | 2.09     | .037     | [0.01, 0.45]    | 0.13             |
| WorkTogetherNorm:Ideology | 0.19     | 0.11 | 1.80     | .072     | [-0.03, 0.41]   | 0.11             |
| LetterFutureGen:Ideology  | 0.13     | 0.12 | 1.12     | .260     | [-0.11, 0.37]   | 0.07             |
| DynamicNorm:Ideology      | 0.09     | 0.11 | 0.81     | .421     | [-0.13, 0.31]   | 0.05             |
| SciConsens:Ideology       | 0.07     | 0.11 | 0.69     | .492     | [-0.15, 0.29]   | 0.04             |
| BindingMoral:Ideology     | 0.02     | 0.11 | 0.21     | .831     | [-0.20, 0.24]   | 0.01             |



Table S16. Results from ordinal mixed model with trees planted in the WEPT as outcome, the interaction of intervention time, condition, and self-reported political ideology (median split within each country) as the fixed effect, with by-country random intercepts. Tests are two-tailed, and no adjustments for multiple comparisons were made.

| Fixed Effect            | Estimate | SE    | <i>z</i> | <i>p</i> | 95% <i>C.I.</i>  | Cohen's <i>d</i> |
|-------------------------|----------|-------|----------|----------|------------------|------------------|
| Time                    | 0.002    | 0.001 | 5.88     | < .001   | [0.002, 0.002]   | 0.003            |
| Ideology                | -0.096   | 0.132 | -0.73    | .465     | [-0.35, 0.16]    | 0.05             |
| PluralIgnorance         | 0.413    | 0.106 | 3.92     | < .001   | [0.21, 0.62]     | 0.23             |
| DynamicNorm             | 0.369    | 0.109 | 3.39     | < .001   | [0.16, 0.58]     | 0.20             |
| SystemJust              | 0.212    | 0.113 | 1.87     | .061     | [-0.01, 0.43]    | 0.12             |
| CollectAction           | 0.167    | 0.115 | 1.45     | .147     | [-0.06, 0.39]    | 0.09             |
| FutureSelfCont          | 0.140    | 0.116 | 1.20     | .230     | [-0.09, 0.37]    | 0.08             |
| WorkTogetherNorm        | 0.105    | 0.112 | 0.94     | .349     | [-0.11, 0.32]    | 0.06             |
| SciConsens              | 0.110    | 0.119 | 0.92     | .357     | [-0.12, 0.34]    | 0.06             |
| NegativeEmotions        | 0.073    | 0.114 | 0.64     | .524     | [-0.15, 0.30]    | 0.04             |
| LetterFutureGen         | -0.125   | 0.124 | -1.01    | .313     | [-0.37, 0.12]    | 0.07             |
| PsychDistance           | -0.261   | 0.122 | -2.14    | .033     | [-0.50, -0.02]   | 0.14             |
| BindingMoral            | -0.757   | 0.109 | -6.94    | < .001   | [-0.97, -0.54]   | 0.42             |
| BindingMoral: Time      | 0.833    | 0.034 | 24.46    | < .001   | [0.77, 0.90]     | 0.04             |
| SciConsens: Time        | 0.018    | 0.003 | 5.37     | < .001   | [0.012, 0.024]   | 0.01             |
| SystemJust: Time        | -0.001   | 0.001 | -1.17    | .243     | [-0.003, 0.001]  | < 0.001          |
| PsychDistance: Time     | -0.001   | 0.001 | -2.45    | .014     | [-0.001, -0.001] | 0.001            |
| DynamicNorm: Time       | -0.001   | 0.001 | -2.53    | .011     | [-0.003, 0.001]  | 0.001            |
| CollectAction: Time     | -0.001   | 0.001 | -2.90    | .004     | [-0.001, -0.001] | 0.002            |
| LetterFutureGen: Time   | -0.002   | 0.001 | -3.73    | < .001   | [-0.002, -0.002] | 0.002            |
| FutureSelfCont: Time    | -0.002   | 0.001 | -4.28    | < .001   | [-0.002, -0.002] | 0.001            |
| PluralIgnorance: Time   | -0.002   | 0.001 | -4.39    | < .001   | [-0.002, -0.002] | 0.002            |
| WorkTogetherNorm: Time  | -0.002   | 0.001 | -4.44    | < .001   | [-0.002, -0.002] | 0.002            |
| NegativeEmotions: Time  | -0.002   | 0.001 | -4.50    | < .001   | [-0.002, -0.002] | 0.002            |
| SciConsens: Ideology    | 0.573    | 0.156 | 3.68     | < .001   | [0.27, 0.88]     | 0.32             |
| PsychDistance: Ideology | 0.369    | 0.168 | 2.20     | .028     | [0.04, 0.70]     | 0.20             |
| SystemJust: Ideology    | 0.317    | 0.154 | 2.05     | .040     | [0.02, 0.62]     | 0.17             |

| Fixed Effect                     | Estimate | SE    | <i>z</i> | <i>p</i> | 95% <i>C.I.</i> | Cohen's <i>d</i> |
|----------------------------------|----------|-------|----------|----------|-----------------|------------------|
| CollectAction: Ideology          | 0.213    | 0.157 | 1.36     | .175     | [-0.09, 0.52]   | 0.02             |
| LetterFutureGen: Ideology        | 0.221    | 0.171 | 1.30     | .195     | [-0.11, 0.56]   | 0.02             |
| DynamicNorm: Ideology            | 0.174    | 0.153 | 1.14     | .254     | [-0.13, 0.47]   | 0.01             |
| FutureSelfCont: Ideology         | 0.138    | 0.163 | 0.84     | .400     | [-0.18, 0.46]   | 0.01             |
| BindingMoral: Ideology           | 0.123    | 0.150 | 0.82     | .414     | [-0.17, 0.42]   | 0.01             |
| NegativeEmotions: Ideology       | 0.066    | 0.158 | 0.42     | .677     | [-0.24, 0.38]   | 0.01             |
| PluralIgnorance: Ideology        | -0.031   | 0.150 | -0.21    | .837     | [-0.33, 0.26]   | 0.003            |
| Time: Ideology                   | 0.000    | 0.001 | -0.22    | .824     | [-0.001, 0.002] | < 0.001          |
| WorkTogetherNorm: Ideology       | -0.040   | 0.162 | -0.25    | .807     | [-0.36, 0.28]   | 0.004            |
| PluralIgnorance: Time: Ideology  | 0.003    | 0.001 | 3.16     | .002     | [0.001, 0.005]  | < 0.001          |
| WorkTogetherNorm: Time: Ideology | 0.002    | 0.001 | 2.47     | .013     | [0.001, 0.004]  | 0.001            |
| DynamicNorm: Time: Ideology      | 0.001    | 0.001 | 1.53     | .126     | [-0.001, 0.003] | < 0.001          |
| BindingMoral: Time: Ideology     | 0.039    | 0.049 | 0.80     | .421     | [-0.06, 0.14]   | 0.001            |
| NegativeEmotions: Time: Ideology | 0.000    | 0.001 | 0.79     | .430     | [-0.002, 0.002] | < 0.001          |
| FutureSelfCont: Time: Ideology   | 0.000    | 0.001 | 0.74     | .458     | [-0.002, 0.002] | < 0.001          |
| LetterFutureGen: Time: Ideology  | 0.000    | 0.001 | 0.02     | .987     | [-0.002, 0.002] | < 0.001          |
| CollectAction: Time: Ideology    | 0.000    | 0.001 | -0.42    | .672     | [-0.002, 0.002] | < 0.001          |
| PsychDistance: Time: Ideology    | 0.000    | 0.001 | -0.73    | .468     | [-0.002, 0.002] | < 0.001          |
| SystemJust: Time: Ideology       | -0.001   | 0.001 | -1.22    | .224     | [-0.003, 0.002] | < 0.001          |
| SciConsens: Time: Ideology       | -0.019   | 0.003 | -5.44    | < .001   | [-0.02, -0.01]  | 0.01             |

## International Ethics Review Statement

Collaborators on each research team, in each country, acquired individual IRB approval by ethics review committees before data collection began. The table below lists the countries, and the names of the review boards who granted approval. The full list of all ethics boards approvals can also be found on OSF: <https://osf.io/ytf89/>

Table S17. List of Review Boards that approved data collection for this work.

| Country Team | Name of Review Board                                                                                             |
|--------------|------------------------------------------------------------------------------------------------------------------|
| Algeria      | Aarhus University's Research Ethics Committee                                                                    |
| Armenia      | RUHR-UNIVERSITÄT BOCHUM Fakultät für Psychologie Ethikkommission                                                 |
| Australia    | Research Ethics Office, The Australian National University                                                       |
| Austria      | The Ethics Committee of the Faculty of Business, Economics and Social Sciences of the University of Bern         |
| Belgium      | Comité d'Avis Ethique de la Faculté des Sciences Psychologiques et de l'Education, Université Libre de Bruxelles |
| Belgium      | Sociaal-Maatschappelijke Ethische Commissie (SMEC), KU Leuven                                                    |
| Brazil       | COMISSÃO NACIONAL DE ÉTICA EM PESQUISA                                                                           |
| Bulgaria     | The Ethics Committee of the Faculty of Business, Economics and Social Sciences of the University of Bern         |
| Canada       | The University of British Columbia, Office of Research Services, Behavioural Research Ethics Board               |
| Canada       | Simon Fraser University Research Ethics                                                                          |
| Czechia      | IRB, Department of Management, Prague University of Economics and Business                                       |
| Chile        | Comité Ético Científico de Ciencias Sociales, Pontificia Universidad Católica de Chile                           |
| China (TW)   | Northwestern University, Institutional Review Board                                                              |
| Denmark      | The Research Ethics Committee, Aarhus BSS                                                                        |
| Ecuador      | University of Oslo, Faculty of Social Sciences, Department of Psychology's Research Ethics Committee             |
| Finland      | IRB Universitetet i Stavanger, Det samfunnsvitenskapelige fakultet/ Institutt for sosialfag                      |
| France       | CUREG, Université de Genève                                                                                      |
| Gambia       | Ethikkommission Paris-Lodron-Universität Salzburg                                                                |
| Germany      | The Ethics Committee of the Faculty of Business, Economics and Social Sciences of the University of Bern         |
| Ghana        | Ethikkommission der Fakultät für Mathematik, Informatik und Statistik, LMU München                               |
| Greece       | Univeristy of Crete Research Ethics Committee                                                                    |
| India        | Ethics Review Board (FMG-UvA), University of Amsterdam                                                           |

|                 |                                                                                                                              |
|-----------------|------------------------------------------------------------------------------------------------------------------------------|
| Ireland         | EHS Research Ethics, University of Limerick                                                                                  |
| Israel          | Social Sciences Ethics Committee, The Hebrew Univesristy of Jerusalem                                                        |
| Italy           | Institutional Review Board for Social & Behavioral Sciences, University of Virginia                                          |
| Italy           | COMITATO ETICO DELLA RICERCA PSICOLOGICA, Dipartimenti/Sezione di Psicologia, Università di Padova                           |
| Japan           | IRB of the Kochi University of Technology                                                                                    |
| Japan           | The Ethics Review Committee on Research with Human Subjects of Waseda University                                             |
| Latvia          | The IRB of the Latvijas Universitātes Humanitāro                                                                             |
| Mexico          | Research Commission of the Leuphana University of Lüneburg                                                                   |
| Morocco         | Institutional Review Board at NYU Abu Dhabi                                                                                  |
| Netherlands     | Ethics Review Board, Tilburg School of Social and Behavioral Sciences, Tilburg University                                    |
| Netherlands     | Ethics Review Board, Communication Science, University of Amsterdam                                                          |
| Netherlands     | Ethics Review Board, Communication Science, University of Amsterdam                                                          |
| New Zealand     | the Science & Med DERC Chair at the Australian National University                                                           |
| Nigeria         | Science, Technology, Engineering, and Mathematics Ethical Review Committee at the University of Birmingham                   |
| North Macedonia | Етичкиот поткомитет за медицина, фармација, ветерина и стоматологија при МАНУ, Македонска академија на науките и уметностите |
| Norway          | Norwegian School of Economics Institutional Review Board                                                                     |
| Peru            | Universidad Peruana Cayetano Heredia                                                                                         |
| Philippines     | University of the Philippines Visayas RESEARCH ETHICS BOARD                                                                  |
| Poland          | Faculty of Philosophy and Social Sciences, Nicolaus Copernicus University                                                    |
| Poland          | Faculty of Philosophy and Social Sciences, Nicolaus Copernicus University                                                    |
| Portugal        | the Ethical and Deontological Committee for Scientific Research (CEDIC) at the University of Lusofona                        |
| Romania         | the Institutional Review Board at the University of Pennsylvania                                                             |
| Russia          | HSE University, Center for sociocultural research                                                                            |
| Russia          | Ethics committee of the Ural Federal University                                                                              |
| Russia          | Ethics Committee of The South Ural University of Technology                                                                  |
| Saudi Arabia    | Research Committee at the Canadian University Dubai                                                                          |
| Serbia          | Ethics Committee of the Department of Psychology, Faculty of Philosophy, University of Novi Sad                              |

|                      |                                                                                                            |
|----------------------|------------------------------------------------------------------------------------------------------------|
| Slovakia             | Univerzita Komenskeho v Bratislave                                                                         |
| Slovenia             | The Ethics Committee of the Faculty of Business, Economics and Social Sciences of the University of Bern   |
| South Africa         | The Ethics Committee of the Faculty of Psychology of the University of Basel                               |
| South Korea          | Ulsan National Institute of Science and Technology                                                         |
| Spain                | Comite Etico de Investigacion con Humanos Universidad de Cordoba                                           |
| Spain                | The Committee for the Use of Human Subjects in Research (CUHSR) at Esade                                   |
| Sri Lanka            | Research Ethics at The London School of Economics and Political Sciences                                   |
| Sudan                | Institutional Review Board at NYU Abu Dhabi                                                                |
| Sweden               | IRB exempt. Waiver added to folder.                                                                        |
| Switzerland          | The Ethics Committee of the Faculty of Business, Economics and Social Sciences of the University of Bern   |
| Switzerland          | Research Ethics Commission of the University of Lausanne (CER-UNIL)                                        |
| Taiwan               | College of Management, National Kaohsiung University of Science and Technology                             |
| Thailand             | School of Global Studies, Thammasat University                                                             |
| Turkey               | Human Research Ethics Committee of Kadir Has University                                                    |
| Turkey               | Human Research Ethics Committee of Kadir Has University                                                    |
| United Arab Emirates | Institutional Review Board at NYU Abu Dhabi                                                                |
| Uganda               | The Science-Geosciences Ethics Review Board (SG ERB) at Utrecht University                                 |
| United Kingdom       | The University of Birmingham's research ethics processes                                                   |
| United Kingdom       | Science, Technology, Engineering, and Mathematics Ethical Review Committee at the University of Birmingham |
| United Kingdom       | The School Research Ethics Panel                                                                           |
| United Kingdom       | The University of Birmingham's research ethics processes                                                   |
| Ukraine              | The ethical review board at Kyiv School of Economics                                                       |
| Uruguay              | Comite de Etica en Investigacion de la Facultad de Psicologia de la Universidad de la Republica            |
| United States        | Science, Technology, Engineering, and Mathematics Ethical Review Committee at the University of Birmingham |
| United States        | Stanford Research Compliance Office                                                                        |
| United States        | The internal review board at New York University                                                           |

Venezuela FSW Research Ethics Review at the University of Amsterdam  
Vietnam University of Economics Ho Chi Minh City
